# Supplementary material
Source: HighWire-hosted journal article supplement (https://jnm.snmjournals.org/highwire/filestream/97835/field_highwire_adjunct_files/0/240325_Supplemental_Data.pdf)
Supplement: 240325_Supplemental_Data.pdf [file 240325_Supplemental_Data.pdf]

Supplemental Table 1. Demographic characteristics and metabolism pattern in amyloid-positive and -negative AD patients

|                                  | amyloid-positive<br>N=396 | amyloid-negative<br>N=67 | p-value |
|----------------------------------|---------------------------|--------------------------|---------|
| Age, years                       | 64.0±7.8                  | 72.4±11.9                | 0.032   |
| Sex, men(%)                      | 201(50.7)                 | 40(59.7)                 | 0.175   |
| Duration of symptoms, years,     | 2.9±1.3                   | 3.0±1.6                  | 0.817   |
| metabolism pattern on<br>FDG-PET |                           |                          | <0.001  |
| AD-P, n (%)                      | 340(85.8)                 | 33(49.2)                 |         |
| FT-P, n (%)                      | 12 (3.0)                  | 9 (13.4)                 |         |
| N-P, n (%)                       | 44 (11.1)                 | 25 (37.3)                |         |

AD-P, AD-pattern hypometabolism; FT-P, frontal and anterior temporal area hypometabolism; N-P, non-specific hypometabolism

Supplemental Table 2. Demographic characteristics and metabolism pattern in amyloid-positive and -negative FTD patients

|                                  | Amyloid-negative<br>N=34 | Amyloid-positive<br>N=2 |
|----------------------------------|--------------------------|-------------------------|
| Age, years                       | 59.4±11.3                | 50, 63                  |
| Gender, men(%)                   | 15(44.1)                 | 0                       |
| Duration of symptoms, years,     | 1.9±1.0                  | 1, 3                    |
| metabolism pattern on<br>FDG-PET |                          |                         |
| FT-P, n (%)                      | 28(82.4)                 | 0                       |
| AD-P, n (%)                      | 5 (14.7)                 | 2                       |
| N-P, n (%)                       | 3 (8.8)                  | 0                       |

AD-P, AD-pattern hypometabolism; FT-P, frontal and anterior temporal area hypometabolism; N-P, non-specific hypometabolism

Supplemental Table 3. The frequencies of the ApoE genotype and allele in amyloid-positive and -negative CI patients. n (%)

|            | Amyloid<br>(N=110) | positive | Amyloid<br>(N=50) | negative | Control<br>(N=322) | P     |
|------------|--------------------|----------|-------------------|----------|--------------------|-------|
| Genotypes  |                    |          |                   |          |                    | <0.01 |
| 2/3, n (%) | 5 (4.5)            |          | 0                 |          | 56 (17.4)          |       |
| 2/4, n (%) | 3 (2.7)            |          | 0                 |          | 0                  |       |
| 3/3, n (%) | 48 (43.6)          |          | 36 (72.0)         |          | 222 (68.9)         |       |
| 3/4, n (%) | 44 (40.0)          |          | 14 (28.0)         |          | 41 (12.7)          |       |
| 4/4, n (%) | 10 (9.1)           |          | 0                 |          | 3 (0.9)            |       |
| alleles    |                    |          |                   |          |                    | <0.01 |
| ε2, n (%)  | 8 (3.6)            |          | 0                 |          | 56 (8.7)           |       |
| ε3, n (%)  | 145 (65.9)         |          | 86 (86.0)         |          | 541 (84.0)         |       |
| ε4, n (%)  | 67 (30.5)          |          | 14 (14.0)         |          | 47 (7.3)           |       |
